# Supplementary material for: Legionella pneumophila prevents proliferation of its natural host Acanthamoeba castellanii
Source: PubMed Central journal article supplement (PMC5091012; doi:10.1038/srep36448), 2016-11-02
Supplement: srep36448-s4.pdf [file srep36448-s4.pdf]

*Legionella pneumophila* prevents proliferation of its natural host *Acanthamoeba castellanii*

Luce Mengue, Matthieu Régnacq, Willy Aucher, Emilie Portier, Yann Héchar, Ascel Samba-Louaka

**Supplementary Data 1**

***Homo sapiens* Cyclin-Dependent Kinase (CDK) protein sequences**

**>CDK1**

MEDYTKIEKIGEGTYGVVYKGRHKTTGQVVAMKKIRLESEEEGVPSTAIREISLLKEL  
RHPNIVSLQDVLMOQDSRLYLIFEFLSMDLKKYLDLSDIPPGQYMDSSLVKSYLEYQILQGI  
VFCHSRRVLHRDLKPQNLLIDDKGTIKLADDFGLARAFGIPIRVYTHEVVTLWYRSPEV  
LLGSARYSTPVDIWSIGTIFAELATKKPLFHGDSEIDQLFRIFRALGTPNNEVWPEVESL  
QDYKNTFPKWKPGSLASHVKNLDENGLDLLSKMLIYDPAKRISGKMALNHPYFNDL  
DNQIKKM

**>CDK2**

MENFQKVEKIGEGTYGVVYKARNKLTGEVVALKKIRLDTEGVPSTAIREISLLKEL  
NHPNIVKLLDVIHTENKLYLVF  
EFLHQDLKKFMDASALTGIPLPLIKSYLFQLLQGLAFCHSHRVLHRDLKPQNLLINTE  
GAIKLADDFGLARAFGVPVRTYTHEVVTLWYRAPEILLGCKYYSTAVDIWSLGCIFAE  
MVTRRALFPGDSEIDQLFRIFRTLGTPEVVWPGVTSMPDYKPSFPKWARQDFSKVV  
PPLDEDGRSLLSQMLHYDPNKRISAKAALAHPPFQDVTKPVPHLRL

**>CDK3**

MDMFQKVEKIGEGTYGVVYKAKNRETGQLVALKKIRLDLEMEGVPSTAIRESLLKE  
LKHPNIVRLLDVVHNERKLYLVFEFLSQDLKKYMDSTPGSELPLHLIKSYLFQLLQGV  
SFCHSHRVIHRDLKPQNLLINELGAIKLADFGGLARAFGVPLRTYTHEVVTLWYRAPEI  
LLGSKFYTTAVDIWSIGCIFAEMVTRKALFPGDSEIDQLFRIFRMLGTPSEDTPWPGVTQ  
LPDYKGSFPKWTRKGLEEIVPNLEPEGRDLLMQLLQYDPSQRITAKTALAHYPYSSPE  
PSPAARQYVLQFRH

**>CDK4**

MATSRYPVAEIGVGAYGTVYKARDPHSGHFVALKSVRVPNGGGGGGLPISTVRE  
VALLRRLEAFEHPNVRLMDVCATSRTDREIKVTLVFEHVDQDLRTYLDKAPPPGLP  
AETIKDLMRQFLRGLDFLHANCIVHRDLKPENILVTSGGTVKLADFGGLARIYSYQMA  
LTPVVVTLWYRAPEVLLQSTYATPVDMWSVGCIFAEMFRRKPLFCGNSEADQLGKIF  
DLIGLPPEDDWPRDVSLPRGAFPPRGPRPVQSVPEMEESGAQLLLEMLTFNPHKRIS  
AFRALQHSYLHKDEGNPE

**> CDK5**

MQKYEKLEKIGEGTYGTVFKAKNRETHEIVALKRVRLLDDDDDEGVPSSALREICLLKE  
LKHKNIVRLHDVLHSDKKLTLVFEFCDQDLKKYFDSCNGDLDPEIVKSFLFQLLKGL  
GFCHSRNVLHRDLKPQNLLINRNGELKLADFGGLARAFGIPVRCYSAEVVTLWYRPPD  
VLFGAKLYSTSIDMWSAGCIFAELANAGRPLFPGNDVDDQLKRIFRLLGTPTEEQWPS  
MTKLPDYKPYMPYPATTSLVNVVVKLNATGRDLLQNLLKCNPVQRISAEELQHPYF  
SDFCPP

**>CDK6**

MEKDGLCRADQQYECVAEIGEGAYGKVFKARDLKNNGGRFVALKRVRVQTGEEGMP  
LSTIREVAVLRHLETFEHPNVVRLFDVCTVSRTDRETKLTLVFEHVDQDLTTYLDKVP  
EPGVPTETIKDMMFQLLRGLDFLHSHR VVHRDLKPQNILVTSSGQIKLADFGGLARIYS  
FQMALTSVVVTLWYRAPEVLLQSSYATPVDLWSVGCIFAEMFRRKPLFRGSSDQDL  
GKILDVIGLPGEEDWPRDVALPRQAFHSKSAQPIEFVTDIDELGKDLLLKCLTFNPA  
KRISAYSALSHPYFQDLERCKENLDSHLPPSQNTSELNTA

**>CDK7**

MALDVKSRAKRYEKLDLFLGEGQFATVYKARDKNTNQIVAIKKIKLGHRSEAKDGIN  
RTALREIKLLQELSHPNIIIGLLDAFGHKSNISLVDFMETDLEVIKDNSLVLTPSHIKA  
YMLMTLQGLEYLHQHWILHRDLKPNNLLLDENGVLKLADFGGLAKSFGSPNRAYTHQ  
VVTRWYRAPELLFGARMYGVGVDMWAVGCILAELLRVPFLPGDSDLDQLTRIFET  
LGTPTTEEQWPDMCSPDYVTFKSFPGIPLHHIFSAAGDDLDDLIQGLFLFNPCARITAT  
QALKMKYFSNRPGPTPGCQLPRPNCPVETLKEQSNPALAIKRKRTEALEQGGLPKKLI  
F

**>CDK9**

MAKQYDSVECPFCDEVSKYEKLAIGQGTGFEVFKARHRKTGQKVALKKVLMENE  
KEGFPITALREIKILQLLKHENVVNLIICRTKASPYNRCKGSIYLVDFDFCEHDLAGLLS  
NVLVKFTLSEIKRVMQMLLNGLYYIHRNKILHRDMKAANVLITRDGVLKLADFGLA  
RAFSLAKNSQPNRYTNRVVTLWYRPELLLGERDYGPPIDLWGAGCIMAEMWTRSPI  
MQGNTEQHQLALISQLCGSITPEVWPNVVDNYELYEKLELVKGQKRKVKDRLKAYVR

DPYALDLIDKLLVLDPAQRIDSDDALNHDFFWSDPMPSDLKGMLSTHLTSMFEYLAP  
PRRKGQSITQQSTNQSRNPATTNQTEFERVF

**>CDK10**

MAEPDLECEQIRLKCIRKEGFFTVPPEHRLGRCRSVKEFEKLNRIEGTYGIVYRARDT  
QTDEIVALKKVRMDKEKDGIPISLREITLLLRLRHPNIVELKEVVVGNHLESIFLVMG  
YCEQDLASLLENMPTPFSEAQVKCIVLQVLRGLQYLHRNFII

HRDLKVSNLLMTDKGCVKTADFGLARAYGVPVKPMPKVVTLWYRAPELLLGT  
QTTSIDMWAVGCILAELLAHRPLLPGTSEIHQIDLIVQLLGTSENIWPGFSKLPLVGQ  
YSLRKQPYNNLKHKFPWLSEAGLRLHFLFMYDPKKRATAGDCLESSYFKEKPLPCE  
PELMPTFPHHRNKRAAPATSEGQSKRCKP

**>CDK11a**

MGDEKDSWKVKTLDLILQEKKRRKEQEEKAEIKRLKNSDDRDSKRDSLEEGELRDH  
CMEITIRNSPYRREDSMEDRGEEDDSLAIKPPQQMSRKEKVHHRKDEKRKEKCRHHS  
HSAEGGKHARVKEREHERRKRHREEQDKARREWERQKRREMAREHSRRERDRLEQ  
LERKRERERKMREQQKEQREQKERERRAEERRKEREARREVSAAHRTMREDYSDKV  
KASHWSRSPRPPRERFELGDGRKPVKEEKMEERDLLSDLQDISDSERKTSSAESSA  
ESGSGSEEEEEEEEEEEEEEGSTSEEEEEEEEEEEEEEEEEETGSNSEEASEQSAAEVSEEEM  
SEDEERENENHLLVVPESRFDRDSGESEEAEEEEVGEVTPQSSALTEGDYVPDSPALLPI  
ELKQELPKYLPALQGCERSVEEFQCLNRIEETGTYGVVYRAKDKKTDEIVALKRLKMEK  
EKEGFPITSLREINTILKAQHPNIVTVREIVVGSNMDKIYIVMNYVEHDLKSLMETMK  
QPFLPGEVKTLMIQLLRGVKHLHDNWILHRDLKTSNLLLSHAGILKVGDFGLAREYG  
SPLKAYTPVVVTQWYRAPELLLGAKEYSTAVDMWSVGCIFGELLTQKPLPFGNSEID  
QINKVFKELGTPSEKIWPGYSELPVVKKMTFSEHPYNNLRKRFGALLSDQGFDMNK

FLTYFPGRRISAEDGLKHEYFRETPLPIDPSMFPTWPAKSEQQRVKRGTSPPPEGGLG  
YSQLGDDDLKETGFHLTTTNQGASAAGPGFSLKF

**>CDK11b**

MGDEKDSWKVKTLDLDEILQEKKRRKEQEEKAEIKRLKNSDDRDSKRDSLEEGELRDH  
RMEITIRNSPYRREDSMEDRGEEDSLAIKPPQQMSRKEKVHHRKDEKRKEKRRHRS  
HSAEGGKHARVKEKEREHERRKRHREEQDKARREWQKRREMAREHSRRERDRL  
EQLERKRERERKMREQQKEQREQKERERRAEERRKEREAREVSAHHRTMREDYSD  
KVKASHWSRSPRPPRERFELGDGRKPVKEEKMEERDLLSDLQDISDSERKTSSAESS  
SAESGSGSEEEEEEEEEEEEEEGSTSESEEEEEEEEEEEEEETGSNSEEASEQSAAEVSEEE  
MSEDEERENENHLLVVPESRFDRDSGESEEAEEEVGEFTPQSSALTEGDYVPDSPALS  
PIELKQELPKYLPALQGCRSVEEFQCLNRIEGTYGVVYRAKDKKTDEIVALKRLKM  
EKEKEGFPITSLREINTILKAQHPNIVTVREIVVGSNMDKIYVMNYVEHDLKSLMETM  
KQPFLPGEVKTLMIQLLRGVKHLHDNWILHRDLKTSNLLSHAGILKVGDFGLAREY  
GSPLKAYTPVVVTLWYRAPELLLGAKEYSTAVDMWSVGCIFGELLTQKPLFPGKSEI  
DQINKVFKDLGTPSEKIWPGYSELPAVKKMTFSEHPYNNLRKRFGALLSDQGFDMN  
KFLTYFPGRRISAEDGLKHEYFRETPLPIDPSMFPTWPAKSEQQRVKRGTSPPPEGGL  
GYSQLGDDDLKETGFHLTTTNQGASAAGPGFSLKF

**>CDK12**

MPNSERHGGKKGSGGASGTLQPSSGGSSNSRERHRLVSKHKRHKSKHSDMGLV  
TPEAASLGTVIKPLVEYDDISSDSDTFSDDMAFKLDRRENDERRGSDRSDDLHKKHRH  
HQHRRSRDLLKAKQTEKEKSQEVSSKSGSMKDRISGSSKRSNEETDDYGKAQVAKSS  
SKESRSSKLHKEKTRKERELKSGHKDRSKSHRKRETPKSYKTVDSPKRRSRSPHRKW  
SDSSKQDDSPSGASYGQDYDLSPSRSHSTSSNYDSYKKSPGSTSRRQSVSPPYKEPSAY  
QSSTRSPSPYSRRQRSVSPYSRRRSSSYERSGSYSGRSPSPYGRRRSSSPFLSKRSLSRSP

LPSRKSMKSRSPAYSRRHSSSHSKKKRSSSRSRHSSISPVRLPLNSSLGAELSRKKKER  
AAAAAAKMDGKESKGSPVFLPRKENSSEVEAKDSGLESKKLPRSVKLEKSAPDTELV  
NVTHLNTEVKNSSDTGKVKLDENSEKHLVKDLKAQGTRDSKPIALKEEIVTPKETETS  
EKETPPPPLTIASPPPPLPTTTPPPQTPPLPPLPIPALPQQPPLPPSQAFAFSQVPASSTSTL  
PPSTHSKTSAVSSQANSQPPVQVSVKTQVSVTAAIPLHKTSTLPPPLPPLLPGLDDMD  
SPKETLPSKPVKKEKEQRTRHLLTDLPLPELPGGDLSPDSEPKAITPPQQPYKKRP  
KICCPRYGERRQTESDWGKRCVDFDIIGIIGEGTYGQVYKAKDKDTGELVALKKVR  
LDNEKEGFPITAIKILRQLIHRVVMKEIVTDKQDALDFKKDKGAFYLVFEYMD  
HDLMGLLESGLVHFSEDHKSFMKQLMEGLECHKKNFLHRDIKCSNILLNNSGQIKL  
ADFGLARLYNSESRPYTNKVITLWYRPELLLGEERYTPAIDVWSCGCILGELFTKK  
PIFQANLELAQLELISRLCGSPCPAVWPDVIKLPYFNTMKPKKQYRRRLREEFSFIPSA  
ALDLLDHMLTLDPSKRCTAEQTLQSDFLKDVESKMAPDLPHWQDCHELWSKKRR  
RQRQSGVVVEPPPSKTSRKETTSGTSTEPVKNSSPAPPQPAPGKVESGAGDAIGLADI  
TQQLNQSELAVLLNLLQSQTDLSIPQMAQLLNIHNSPEMQQLEALNQSISALTEATS  
QQQDSETMAPEESLKEAPSAPVILPSAEQTTLEASSTPADMQNILAVLLSQLMKTQEP  
AGSLEENNSDKNSGPQPRRTPTMPQEEAAACPPHILPPEKRPPEPPGPPPPPPPPPLVE  
GDLSSAPQELNPAVTAALLQLLSQPEAEPPGHPHEHQALRPMEYSTRPRPNRTYGNT  
DGPETGFSAITDERNSGPALTESLVQTLVKNRTFSGLSHLGESSYQGTGSVQFPGD  
QDLRFARVPLALHPVVGQPFLKAEGSSNSVVHAETKLQNYGELGPGTTGASSGAGL  
HWGGPTQSSAYGKLYRGPTRVPPRGGRGRGVY

**>CDK13**

MPSSSDTALGGGGGLSWAEKKLEERRKRRRFLSPQQPPLLLPLLQPQLLQPPPPPPPLL  
FLAAPGTAAAAAAAASSSCFSPGPPLEVKRLARGKRRAGGRQKRRRGPRAGQEA  
EKRRVFSLPQPQDGGGGASSGGVTPLEVEDVSSQSEQLLLGGASAATAATAA  
GGTGGSGGSPASSSGTQRRGEGSERPRRDRSSSGRSKERHREHRRRDGQRGGSEA

SKSRSRSHSHSGEERAEVAKSGSSSSSGRRKSASATSSSSSRKDRDSKAHRSRTKSSK  
EPPSAYKEPPKAYREDKTEPKAYRRRRSLSPLGGRDDSPVSHRASQSLRSRKSPSPAG  
GGSSPYSRRLPRSPSPYSRRRSPSYSRHSSYERGGDVSPSPYSSSSWRRSRSPYSPVLR  
SGKSRSRSPYSSRHSRSRSRHLSRSRSRHSSISPSTLTLKSSLAAELNKNKKARAAEA  
ARAAEAAKAAEATKAAEAAKAAKASNTSTPTKGNTETSASASQTNHVKDVKIKI  
EHAPSPSSGGTLKNDKAKTKPPLQVTKVENNLIVDKATKKAIVIVGKESKSAATKEES  
VSLKEKTKPLTPSIGAKEKEQHVALVTSTLPLPLPPMLPEDKEADSLRGNISVKAVK  
KEVEKCLRCLLADLPLPELPGGDDLKSKSPEEKKTATQLHSKRRPKICGPYGETKEK  
DIDWKGKRCVDKFDIIGIIGEGTYGQVYKARDKDTGEMVALKKVRLDNEKEGFPITAIR  
EIKILRQLTHQSIINMKEIVTDKEDALDFKKDKGAFYLVFEYMDHDLMGLLESGLVHF  
NENHIKSFMRQLMEGLDYCHKKNFLHRDIKCSNILLNNRGQIKLADFLARLYSSEES  
RPYTNKVITLWYRPPPELLLGEERYTPAIDVWSCGCILGELFTKKPIFQANQELAQLELI  
SRICGSPCPAVWPDVIKLPYFNTMKPKKQYRRKLREEFVFIPAAALDFDYMLALDPS  
KRCTAEQALQCEFLRDVEPSKMPPDLPLWQDCHELWSKKRRRQKQMGMTDDVSTI  
KAPRKDLSLGLDDSRNTNPQGVLPSSQLKSQGSSNVAPVKTGPGQHLNHSELAILLNL  
LQSKTSVNMADFVQVLNIKVNSETQQQLNKNINLPAGILATGEKQTDPTPQQESSKPL  
GGIQPSSQTIQPKVETDAAQAAVQSAFAVLLTQLIKAQQSKQKDVILLEERENGSGHE  
ASLQLRPPPEPSTPVSGQDDLIQHQDMRILELTPEPDRPRILPPDQRPEPEPEPPVTEED  
LDYRTENQHVPPTSSSLTDPHAGVKAALLQLLAQHQPQDDPKREGGIDYQAGDTYV  
STSDYKDNFGSSSFSSAPYVSNDGLGSSSAPPLERRSFIGNSDIQSLDNYSTASSHSGGP  
PQPFAFSESFSSVAGYGDIYLNAGPMLFSGDKDHRFEYSHGPIAVLANSSDPSTGPES  
THPLPAKMHNINYGGNLQENPSGPSLMHGQWTWSPAQGGYYSQGYRGHISTSTGRG  
RGRGLPY

>CDK14

MHGYFGCNAAAEPGYSAFVGTPQICVTKMSTRNCQGMDSVIKPLDTIPEDKKVRVQ  
RTQSTFDPF EK PANQVKRVHSENNACINFKTSSTGKESPKVRRHSSPSSPTSPKFGKAD  
SYEKLEKLGEGSYATVYK GKSKVNGKLVALKVIRLQEEEGTPFTAIREASLLKGLKH  
ANIVLLHDIHTKETLTLVFEYVHTDLCQYMDKHPGGLHPDNVKLFLFQLLRGLSYIH  
QRYILHRDLKPQNLLISDTGELKLADFGLARAKSVPSHTYSNEVVTLWYRPPDVLLGS  
TEYSTCLDMWGVGCIFVEMIQGVAAFPGMKDIQDQLERIFLVLGTPNEDTWPGVHSL  
PHFKPERFTLYSSKNLRQAWNKLSYVNHAEDLASKLLQCSPKNRLSAQAALSHEYFS  
DLPPRLWELTDMSSIFTVPNVRLQPEAGESMRAFGKNNSYGKSLNSKH

**>CDK15**

MTSFHPRGLQAARAQKFKSKRPRSNSDCFQEEDLRQGFQWRKSLPFGAASSYLNLEK  
LGEYSYATVYKGISRINGQLVALKVISMNAEEGVPFTAIREASLLKGLKHANIVLLHDI  
IHTKETLTFVFEYMHTDLAQYMSQHPGGLHPHNVRLFMFQLLRGLAYIHHQHVLHR  
DLKPQNLLISHLGELKLADFGLARAKSIPSQTYSSSEVVTLWYRPPDALLGATEYSSEL  
DIWGAGCIFIEMFQQGPLFPGVSNILEQLEKIWEVLGVPTEDTWPGVSKLPNYPNPEWF  
PLPTPRSLHV VWNRLGRVPEAEDLASQMLKGFPRDRVSAQEALVHDYFSALPSQLYQ  
LPDEESLFTVSGVRLKPEMCDLLASYQKGHPAQFSKCW

**>CDK16**

MDRMKKIKRQLSMTLRGGRGIDKTNGAPEQIGLDESGGGGGSDPGEAPTRAAPGELR  
SARGPLSSAPEIVHEDLKMGSDGESDQASATSSDEVQSPVRVRMRNHPPRKISTEDIN  
KRLSLPADIRLPEGYLEKLTLSPIFDKPLSRRLRRVSLSEIGFGKLETYIKLDKLGEGT  
YATVYK GKSKLTDNLVALKEIRLEHEEGAPCTAIREVSLLKDLKHANIVTLHDIHTE



KSLTLVFEYLDKDLKQYLDDCGNIINMHNVKLFLFQLLRGLAYCHRQKVLHRDLKP  
QNLLINERGELKLADFGLARAKSIPTKTY SNEVVTLWYRPPDILLGSTDYSTQIDMWG  
VGCIFYEMATGRPLFPGSTVEEQ LHFIFRILGTPTEETWPGILSNEEFKTYNYPKYRAE  
ALLSHAPRLDSDGADLLTKLLQFEGNRNISAEDAMKHPFFLSLGERIHKLPDTSIFAL  
KEIQLQKEASLRSSSMPDSGRPAFRVVDTEF

**>CDK17**

MKKFKRRLS LTLRGSQTIDESLSELAEQMTIEENS SKDNEPIVKNGRPPTSHSMHSFLH  
QYTGSFKKPPLRRPHSVIGGSLGSFMAMPRNGSRLDIVHENLKMGS DGEDSQASGTS  
SDEVQSPTGVCLRNRIHRRISMEDLNKRLSLPADIRIPDGYLEKLQINSPPFDQPMSRRS  
RRASLSEIGFGKMETYIKLEKLGE GTYATVYKGRSKLTENLVALKEIRLEHEEGAPCT  
AIREV SLLKDLKHANIVTLHDIVHTDKSLTLVFEYLDKDLKQYMDDCGNIMSMHNV  
KLFLYQILRGLAYCHRRKVLHRDLKPQNLLINEKGELKLADFGLARAKSVPTKTYSN  
EVVTLWYRPPDVLLGSSEYSTQIDMWGVGCIFFEMASGRPLFPGSTVEDELHLIFRLL  
GTPSQETWPGISSNEEFKNYNFPKYKPQPLINHAPRLDSEGIELITKFLQYESKKRVSA  
EEAMKHVYFRSLGPRIHALPESVSIFSLKEIQLQKDPGFRNSSYPETGHGKNRRQSMLF

**>CDK18**

MIMNKMKNFKRRFSLSVPR TETIEESLAEFTEQFNQLHNRRNENLQLGPLGRDPPQEC  
STFSPTDSGEEPGQLSPGVQFQRRQNQRRFSMEVRASGALPRQVAGCTHKGVHRRAA  
ALQPFDVSKRLSLPMDIRLPQEFLQKLQMESPDLPKPLSRMSRRASLSDIGFGKLET  
YVKLDKLGEGTYATVFKGRSKLTENLVALKEIRLEHEEGAPCTAIREV SLLKNLKHA  
NIVTLHDLIHTDRSLTLVFEYLDSDLKQYLDHCGNLMSMHNVKIFMFQLLRGLAYCH  
HRKILHRDLKPQNLLINERGELKLADFGLARAKSVPTKTY SNEVVTLWYRPPDVLLG  
STEYSTPIDMWGVGCIIHYEMATGRPLFPGSTVKEELHLIFRLLGTPTEETWPGVTAFS

EFRTYSFPCYLPQPLINHAPRLD TDGIHLLSSLLLYESKSRMSAE AALSHSYFRSLGER  
VHQLEDTASIFSLKEIQLQKDPGYRGLAFQQPGRGKNRRQSIF

**>CDK19**

MDYDFKAKLAAERERVEDLFEYEGCKVGRGTYGHVYKARRKD GKDEKEYALKQIE  
GTGISMSACREIALRELKHPNVIALQKVFLSHSDRKVWLLFDYAEHDLWHIIKFHRA  
SKANKKPMQLPRSMVKSLLYQILDGIHYLHANWVLHRDLK PANILVMGEGPERGRV  
KIADMGFARLFNSPLKPLADLDPVVVTFWYRAPELLLGARHYTKAIDIWAIGCIFAEL  
LTSEPIFHCRQEDIKTSNPFHHDQLDRIFSVMGFPADKDWEDIRKMPEYPTLQKDFRR  
TTYANSSLIKYMEKHKVKPDSKVFLLLQKLLTMDPTKRITSEQALQDPYFQEDPLPTL  
DVFAGCQIPYPKREFLNEDDPEEKGDKNQQQQNQHQPTAPPQQAAPPQAPPQ  
QNSTQTNGTAGGAGAGVGGTGAGLQHSQDSSLNQVPPNKKPRLGPSGANS GGPVMP  
SDYQHSSSRLNYQSSVQGSSQSSTLGYSSSSQSSQYHPSHQAHR Y

**>CDK20**

MDQYCILGRIGEGAHGIVFKAKHVETGEIVALKKVALRRLEDGF PNQALREIKALQE  
MEDNQYVVQLKAVFPHG GGFVLA FEFMLS DLAEVVRHAQRPLAQAQVKSYLQMLL  
KGVAFCHANNIVHRDLK PANLLISASGQLKIADFG LARVFSPDGSRLYTHQVATR WY  
RAPELLYGARQYDQGV DLWSVGCIMGELLNGSPLFP GKNDIEQLCYVLRILGTPNPQ  
VWPELTEL PDYNKISFKEQVPMPLEEVLPDVSPQALDLLGQFLLYPPHQRIAASKALL  
HQYFFTAPLPAHPSELPIPQRLGGPAPKAHPGPPHIHDFHVDRPLEESLLNPELIRPFILE  
G



***Homo sapiens* outgroup protein sequences used to built the phylogenetic tree**

**>CDKL1**

MMEKYEKIGKIGEGSYGVVFKCRNRDTGQIVAIKKFLESEDDPVIKKIALREIRMLKQ  
LKHPNLVNLLEVFRRKRRLHLVFEYCDHTVLHELDRYQRGVPEHLVKSITWQTLQA  
VNFCHKHNCIHRDVKPENILITKHSVIKLCDFGFARLLTGPSDYTYDYVATR WYRSPE  
LLVGDTQYGPPVDVWAIGCVFAELLSGVPLWPGKSDVDQLYLIRKTLGDLIPRHQQV  
FSTNQYFSGVKIPDPEDMEPELELKFPNISYPALGLLKGCLHMDPTQRLTCEQLLHHPY  
FENIREIEDLAKEHNKPTRKTLRKS RKHHCFTETSKLQYLPQLTGSSILPALDNKKYYC  
DTKKLNYRFPNI

**>GSK3alpha**

MSGGGPSGGGPGGSGRARTSSFAEPGGGGGGGGGGPGGSASGPGGTGGGKASVGA  
MGGGVGASSSGGGPGGSGGGGSGGPGAGTSFPPPGVKLGRDSGKVTTVVATLGQGP  
ERSQEVAYTDIKVIGNGSFGVVYQARLAETRELVAIKKVLQDKRFKNRELQIMRKLD  
HCNIVRLRYFFYSSGEKKDELYLNLVLEYVPETVYRVARHFTKAKLTIPILYVKVYM  
YQLFRSLAYIHSQGVCHRDIKPQNLLVDPDTAVLKLCDFGSAKQLVRGEPNVS YICSR  
YYRAPELIFGATDYTSSIDVWSAGCVLAELLLGQPIFPGDSGVDQLVEIHKVLGTPTRE  
QIREMNPNYTEFKFPQIKAHPWTKVFKSRTPEAIALCSSLLEYTPSSRLSPLEACAHSF  
FDEL RCLGTQLPNNRPLPPLFNFSAGELSIQPSLNAILIPHLRSPAGTTTTLTPSSQALTE  
TPTSSDWQSTDATPTLTNSS

**>MAK**

MNRYTTMRQLGDGTYGSVLMGKSNESGELVAIKRMKRKFYSWDECMNLREVKSLK  
KLNHANVIKLKEVIRENDHLYFIFEYMKENLYQLMKDRNKLPESVIRNIMYQILQGL  
AFIHKHGFFHRDMKPENLLCMGPELVKIADFGFLARELRSQPPYTDYVSTRWYRAPEV  
LLRSSVYSSPIDVWAVGSIMAELYMLRPLFPGTSEVDEIFKICQVLGTPKKS DWPEGY  
QLASSMNFRFPQCVPINLKTLPNASNEAIQLMTEMLNWDPKKRPTASQALKHPYFQ  
VGQVLGPSSNHLESKQSLNKQLQPLESKPSLVEVEPKPLPDIIDQVVGQPQPKTSQQPL  
QPIQPPQNLSVQQPPKQQSQEKPPQTLFPSIVKNMPTKPNGTLSHKSGRRRWGQTIFKS  
GDSWEELEDYDFGASHKKPSMGVFKEKRKKDSPFRLPEPVPSGSNHSTGENKSLPA  
VTSLKSDSELSTAPTSKQYYLKQSRYLPGVNPKKVSLIASGKEINPHTWSNQLFPKSL  
GPVGAELAFKRSNAGNLGSYATYNQSGYIPSFLKKEVQSAGQRIHLAPLNATASEYT  
WNTKTGRGQFSGRTYNPTAKNLNIVNRAQPIPSVHGRTDWVAKYGGHR

**Putative *A. castellanii* CDK resulting from the blast of all human CDKs**

**>XP\_004353710.1 Cdc2b**

MQAKPSPLQRYDIKEKLGEGTYGEVYKAIDTENQRFIALKKMRLLEAEDEGVPATAL  
REVSLKELSNCANIVKLLDVIHCNSTLYLVFEFLDQDLKTYVESTGAGALPTKLVKS  
YLYQILKGIAYCHSHRILHRDLKLANLLIDRKGVLKLADFGLARAFGVPIRTYTHEVV  
TLWYRAPEILLGQARYSTPVDMWSVGCIFAELVTKRPLFPGDCEIDELFRIFRTLGTPN  
EEVWPGVTTLPDYKSTFGQWKPQSLASVVPGLDPLGLDLLSKMLRYAPQERISAKEA  
LKHPYFDDLDKTKYP

**>XP\_004336625.1 cdk10/11**

MEDQQQPSRPRGRGPIVGLSPPSGSTKRRAHDAEDEHTPPAVGTKRARSSSGGKEREE  
GGATPTAGNGLPASPAPRAPSPSSSSSSSSSVPPKGASPGQRAASPQGTPLRAAAAGLP  
VLVAAMRSCRSVDHYERLNRIQEGAYGVVHRAKDKETGEVVALKKFKIKGDESPV  
TALRELAVLMEMDHPNVVRAKEIVIGKDPNSFYLVMEFLEHDLKDLMTAMRDPFLQ  
SEIKCLLQQLLEAIAIYIHDNWYLHRDLKTSNLLLSSKGILKVADFGLARHYGDPLRPY  
TQPVVTLWYLAKRPIDPYRAPELLLGAKEYSWEIDMWA VGCIFAEMLCKEPLMKAQ  
TELQ MIDQIFKMLGTPNDDVWPGFSELPFVKMKFKTYPSAIRQRMFSATTDAGFDL  
LMSFLAYDPKKRITAREALSHRYFTEPPLPREPGMIQTFPSLHEGTRPRPNSPGVEGGL  
FGAHLSDSTDAHAALGIDPYGHQPTGFKLR

**>XP\_004367653.1 protein kinase domain containing protein**

MKRSREEMPTTLHRRTQSHGSILPTNASSSSSSARASTFLPPAAPSLGSSSSSSSSSVARP  
PSHIQITRPPQPRRETSSRHTPTPTSGGRLAANPSTPAAAKSSSSPFGGFSASRAIDESLL  
MGTCRRIQQYETLEQVGEVYGVVYRARDMRSNRIVALKKVRMEKEKDGIPITCLRE

VKILKEVDHPNIVRLLGVTVGRQLDAMYLA FEYVEHDLAGLIDNMKKPFTEAEVKC  
LMMQLLRAVHYLHRNYIHRDLKLSNLLFSNKGELKLCDFGLARIFGEPNKAMTPK  
VDMWAVGCIFGELLMNTPVMPGKTEIEQLQLMCRL LGTPNDKIWP GYYELPNAKIIA  
GLPQQNYHMISNKF KFLSPAGQDLIKKFLTYDPNKRITAYQALQHPYFTESPMPKSPD  
MMPTFPTKLNTGYRRARRSDEVQEDRRMDEERRHQNDRFGEVFGDHDYAGGAPLK  
KRRF

**>XP\_004335644.1 Cyclindependent kinase**

MTIFKKPAVGLRQRLTFDDFHIEQVGE GTYGRVFKARNKHTNKL TALKVVFPTEDD  
EGLPFTAVREIKYLQMLHDNPNVIKLEGTFFTKDGELVLA FEYMENDLSGLLSLKNL  
QFPAQTKCLFKQVLEGLHQCHSAGIMHRDIKAANLLL NNGQLKLADFG LASNYAR  
RRTFSTNVVTLWYRAPELLLG VNTYGPKVDIWSAGCLFIELLTRQSPFPGREEKHQLE  
LIVRTC GTPDERNWPGVTKLEGYKLLQGLMGHKNRLSEVFGKFDPRALD LLSKMLA  
LNPAQRPTASEALDHDYFWADPLPCKATELPHYPAMHEYEAKKTRQNERQPKRQKV  
SNYAPNPYP SHHHQGYPSGAPAPQSSRGDYAPPPHYPHPSYPSKPGQTLLWVLTGDP  
RLTERIPKPTGTPPLRAMAFSRRLPSLFPPPTRCGRPATQALVDSQAGMRLRGQWVRG  
HLSITVAPLLHRRPCSETANTPPRPATPAQLPPAGRSAEYSRVPREHRPPTSAAMAPSS  
LGGGGHHLGGPRHDMPPMASYNRPPAGAH RPHHHLHHHQQ LHHPITDGHASAAAY  
SGVHRSHARATLSSVERMEVGVDTMGKRKREAAVPL

**>XP\_004342572.1 protein kinase domain containing protein**

MIFKKPAVHVQRLSFDDFYIIEQVGE GTYGRVFKARNVHTNKL TALKVVFPTEDDEG  
LPFTAVREIKYLQMLSDNPNVIKLEGTFFTRDGELVLA FEYMENDLSGLLSLKNLQFS  
PAQTKCLFKQVLEGLHQCHRAGIMHRDIKAANLLL NNGELKMADFG LASNYLRRRT  
FSTNVVTLWYRAPELLGVNAYGPKVDIWSAGCLFIELLTRQSPFPGREEKHQLELIV  
RTC GTPDERNWPGVTKLEGYKQLQGLMGHKNRLREVFGKFDPRALD LLSRMLSLNP

ADRPTASEALDHDYFWTDPVCKATDLPHY PAMHEYEAKKTRQSERQPKRQRVTGY  
APNVPVAPLRSQPYPPHNAGYPPHVPLPVPQQPARGDYPPPLPSPHYAHL PYPSSKLG  
QYGQPPARQNLPTGPQGWPAAHGTHPPAAGNLLPTPHVPLTVPGHPPRPTGYAG  
ASSYPGIHPPSAMPHYDAARSSGSRHRQPSSGSLVASARHPLVSSGLPPHRIGGAQPQS  
SSSSSSLPPSTGLRGGYHHAGPREMNRPPTSSARVEGGPRHDMPPHLASGYNRPPAGA  
HRPVHHHAALQHNNHLGHPIIADGHHAPTAHNSVHKSHARATLSSVERMGVGVDDT  
GKRKREATPLS
